# Supplementary material
Source: publisher figshare collection journal article supplement (https://acs.figshare.com/ndownloader/files/4384393)
Supplement: Supplementary file 1 [file 4384393]

**Quantitative Prediction Of Atrazine Sorption In A Manitoba Soil Using Conventional Chemical Kinetics Instead Of Empirical Parameters.**

**Donald S. Gamble<sup>1\*</sup>, G. Barrie Webster<sup>2</sup>, and Marc Lamoureux<sup>3</sup>**

**1\* To whom correspondence should be addressed. Department of Chemistry, Saint Mary's University. Halifax Nova Scotia B3H 3C3 [dgamble@ns.sympatico.ca](mailto:dgamble@ns.sympatico.ca)**

**2 Formerly the Department of Soil Science, University of Manitoba, Winnipeg Manitoba.**

**3 Department of Chemistry, Saint Mary's University. Halifax Nova Scotia B3H 3C3**

**SUPPORTING INFORMATION**

**Table S1**  
**Spreadsheet formulas For Kinetics**

| <b>Z<sub>1</sub>: Column O</b>                   |
|--------------------------------------------------|
| $+I\$22*((@EXP(\$N10*\$L10))-1)$                 |
| $+I\$22*((@EXP(\$N11*\$L11))-1)$                 |
| $+I\$22*((@EXP(\$N12*\$L12))-1)$                 |
| $+I\$22*((@EXP(\$N13*\$L13))-1)$                 |
| $+I\$22*((@EXP(\$N14*(\$L14-\$L13)))-1)+\$O13$   |
| $+I\$22*((@EXP(\$N15*(\$L15-\$L10)))-1)+\$O\$11$ |

| <b>Z<sub>2</sub>: Column P</b>                          |
|---------------------------------------------------------|
| $(\$I\$20*(@EXP(\$N10*\$L10))-\$I\$21)$                 |
| $(\$I\$20*(@EXP(\$N11*\$L11))-\$I\$21)$                 |
| $(\$I\$20*(@EXP(\$N12*\$L12))-\$I\$21)$                 |
| $(\$I\$20*(@EXP(\$N13*\$L13))-\$I\$21)$                 |
| $(\$I\$20*(@EXP(\$N14*(\$L14-\$L13)))-\$I\$24)+\$P13$   |
| $(\$I\$20*(@EXP(\$N15*(\$L15-\$L10)))-\$I\$24)+\$P\$11$ |

| <b>Columns Q &amp; R</b>                 |                      |
|------------------------------------------|----------------------|
| <b>(Z<sub>1</sub>/Z<sub>2</sub>) + Y</b> | <b>M<sub>1</sub></b> |
| <b>(Mol/L)</b>                           | <b>(Mol/L)</b>       |
| $+\$O10/\$P10+\$Y10$                     | $+\$I\$21-\$Q10$     |
| $+\$O11/\$P11+\$Y11$                     | $+\$I\$21-\$Q11$     |
| $+\$O12/\$P12+\$Y12$                     | $+\$I\$21-\$Q12$     |
| $+\$O13/\$P13+\$Y13$                     | $+\$I\$21-\$Q13$     |
| $+\$O14/\$P14+\$Y14$                     | $+\$I\$21-\$Q14$     |
| $+\$O15/\$P15+\$Y15$                     | $+\$I\$21-\$Q15$     |

| <b>Column Y</b>                           |
|-------------------------------------------|
| <b><math>Y = \theta_{d1}(W/V)</math></b>  |
| <b>(Mol/L)</b>                            |
| $+\$V10*(1-@EXP(-\$Z10*(\$L10-\$L\$10)))$ |
| $+\$V11*(1-@EXP(-\$Z11*(\$L11-\$L\$10)))$ |
| $+\$V12*(1-@EXP(-\$Z12*(\$L12-\$L\$10)))$ |
| $+\$V13*(1-@EXP(-\$Z13*(\$L13-\$L\$10)))$ |
| $+\$V14*(1-@EXP(-\$Z14*(\$L14-\$L\$10)))$ |
| $+\$V15*(1-@EXP(-\$Z15*(\$L15-\$L\$10)))$ |

**Table S2**  
**Spreadsheet Entries For Iterative Calculations**

| <b>ITERATIONS</b>                |                    |                              |                      |
|----------------------------------|--------------------|------------------------------|----------------------|
| <b>Copy Formulas AD &amp; AE</b> |                    | <b>To Values AB &amp; AC</b> |                      |
| <b>Labile Sorption</b>           | <b>Bound Res.</b>  | <b>Labile Sorption</b>       | <b>Bound Res.</b>    |
| *****                            | *****              | *****                        | *****                |
| <b>Values</b>                    | <b>Values</b>      | <b>For Iteration</b>         | <b>For Iteration</b> |
| $\theta_{a1}(W/V)$               | $\theta_{d1}(W/V)$ | $\theta_{a1}(W/V)$           | $\theta_{d1}(W/V)$   |
| <b>(Mol/L)</b>                   | <b>(Mol/L)</b>     | <b>(Mol/L)</b>               | <b>(Mol/L)</b>       |
| *****                            | *****              | *****                        | *****                |
| 0.0000E+00                       | 0.0000E+00         | +\$V10                       | +\$Y10               |
| 1.8219E-07                       | 1.2384E-09         | +\$V11                       | +\$Y11               |

**TABLE S3: Model 4a Calibration**

| Experimental Rate Coefficients |        |                 |                    |
|--------------------------------|--------|-----------------|--------------------|
| No.                            | t      | k <sub>r1</sub> | k <sub>d</sub>     |
|                                | DAYS   | g/(Mol x days)  | DAYS <sup>-1</sup> |
| 1                              | 0.000  |                 |                    |
| 2                              | 0.130  | 1.2667E+07      | 5.2465E-02         |
| 3                              | 0.180  | 9.8906E+06      | 4.9055E-02         |
| 4                              | 0.250  | 8.3890E+06      | 4.2640E-02         |
| 5                              | 0.500  | 9.9334E+06      | 4.3179E-02         |
| 6                              | 1.000  | 2.8535E+06      | 4.4242E-02         |
| 7                              | 1.100  | 2.6274E+06      | 4.4019E-02         |
| 8                              | 1.200  | 2.4391E+06      | 4.3798E-02         |
| 9                              | 1.250  | 2.3563E+06      | 4.3689E-02         |
| 10                             | 2.000  | 1.6118E+06      | 4.2108E-02         |
| 11                             | 2.125  | 1.5390E+06      | 4.1855E-02         |
| 12                             | 2.200  | 1.4993E+06      | 4.1704E-02         |
| 13                             | 2.250  | 1.4733E+06      | 4.1622E-02         |
| 14                             | 3.000  | 1.2001E+06      | 4.0169E-02         |
| 15                             | 3.050  | 1.1867E+06      | 4.0076E-02         |
| 16                             | 3.100  | 1.1737E+06      | 3.9985E-02         |
| 17                             | 3.150  | 1.1611E+06      | 3.9893E-02         |
| 18                             | 3.200  | 1.1489E+06      | 3.9803E-02         |
| 19                             | 3.250  | 1.1371E+06      | 3.9713E-02         |
| 20                             | 3.900  | 1.0113E+06      | 3.8581E-02         |
| 21                             | 4.000  | 9.9598E+05      | 3.8404E-02         |
| 22                             | 4.150  | 9.8750E+05      | 3.7805E-02         |
| 23                             | 4.200  | 9.6701E+05      | 3.8070E-02         |
| 24                             | 4.250  | 9.6020E+05      | 3.7987E-02         |
| 25                             | 7.000  | 7.3940E+05      | 3.3948E-02         |
| 26                             | 7.125  | 7.3360E+05      | 3.3785E-02         |
| 27                             | 7.200  | 7.3022E+05      | 3.3688E-02         |
| 28                             | 7.250  | 7.2800E+05      | 3.3624E-02         |
| 29                             | 8.000  | 6.9844E+05      | 3.2688E-02         |
| 30                             | 8.050  | 6.9668E+05      | 3.2628E-02         |
| 31                             | 8.150  | 6.9324E+05      | 3.2507E-02         |
| 32                             | 8.200  | 6.9155E+05      | 3.2448E-02         |
| 33                             | 8.250  | 6.8989E+05      | 3.2388E-02         |
| 34                             | 9.000  | 6.6742E+05      | 3.1520E-02         |
| 35                             | 9.250  | 6.6084E+05      | 3.1242E-02         |
| 36                             | 10.000 | 6.4338E+05      | 3.0435E-02         |
| 37                             | 10.100 | 6.4128E+05      | 3.0330E-02         |
| 38                             | 10.200 | 6.3923E+05      | 3.0227E-02         |
| 39                             | 10.250 | 6.3822E+05      | 3.0175E-02         |
| 40                             | 11.000 | 6.2444E+05      | 2.9423E-02         |
| 41                             | 11.050 | 6.2361E+05      | 2.9374E-02         |
| 42                             | 11.150 | 6.2196E+05      | 2.9277E-02         |
| 43                             | 14.000 | 5.8754E+05      | 2.6760E-02         |
| 44                             | 14.050 | 5.8711E+05      | 2.6720E-02         |
| 45                             | 14.125 | 5.8647E+05      | 2.6659E-02         |
| 46                             | 14.200 | 5.8584E+05      | 2.6600E-02         |
| 47                             | 15.000 | 5.7974E+05      | 2.5977E-02         |
| 48                             | 15.050 | 5.7939E+05      | 2.5940E-02         |
| 49                             | 15.125 | 5.7888E+05      | 2.5883E-02         |
| 50                             | 15.200 | 5.7836E+05      | 2.5827E-02         |
| 51                             | 15.250 | 5.7805E+05      | 2.5789E-02         |
| 52                             | 16.000 | 5.7408E+05      | 2.5162E-02         |
| 53                             | 16.050 | 5.7324E+05      | 2.5204E-02         |
| 54                             | 16.150 | 5.7270E+05      | 2.5133E-02         |
| 55                             | 16.250 | 5.7270E+05      | 2.5044E-02         |
| 56                             | 16.800 | 5.6950E+05      | 2.4680E-02         |
| 57                             | 17.000 | 5.6862E+05      | 2.4544E-02         |
| 58                             | 17.050 | 5.6841E+05      | 2.4510E-02         |
| 59                             | 17.100 | 5.6820E+05      | 2.4476E-02         |
| 60                             | 17.200 | 5.6779E+05      | 2.4409E-02         |
| 61                             | 18.000 | 5.6486E+05      | 2.3885E-02         |
| 62                             | 18.050 | 5.6470E+05      | 2.3853E-02         |
| 63                             | 18.125 | 5.6446E+05      | 2.3806E-02         |
| 64                             | 18.200 | 5.6423E+05      | 2.3758E-02         |
